# Supplementary material
Source: HighWire-hosted journal article supplement (https://jnm.snmjournals.org/highwire/filestream/94006/field_highwire_adjunct_files/0/60418_Supplemental_Figure_1.pdf)
Supplement: 60418_Supplemental_Figure_1.pdf [file 60418_Supplemental_Figure_1.pdf]

**A novel method of  $^{18}\text{F}$  radiolabeling for PET**

William J McBride, Robert M. Sharkey, Habibe Karacay, Christopher A D'Souza, Edmund A Rossi, Peter Laverman, Chien-Hsing Chang, Otto C Boerman, and David M Goldenberg

Supplemental Figure 1

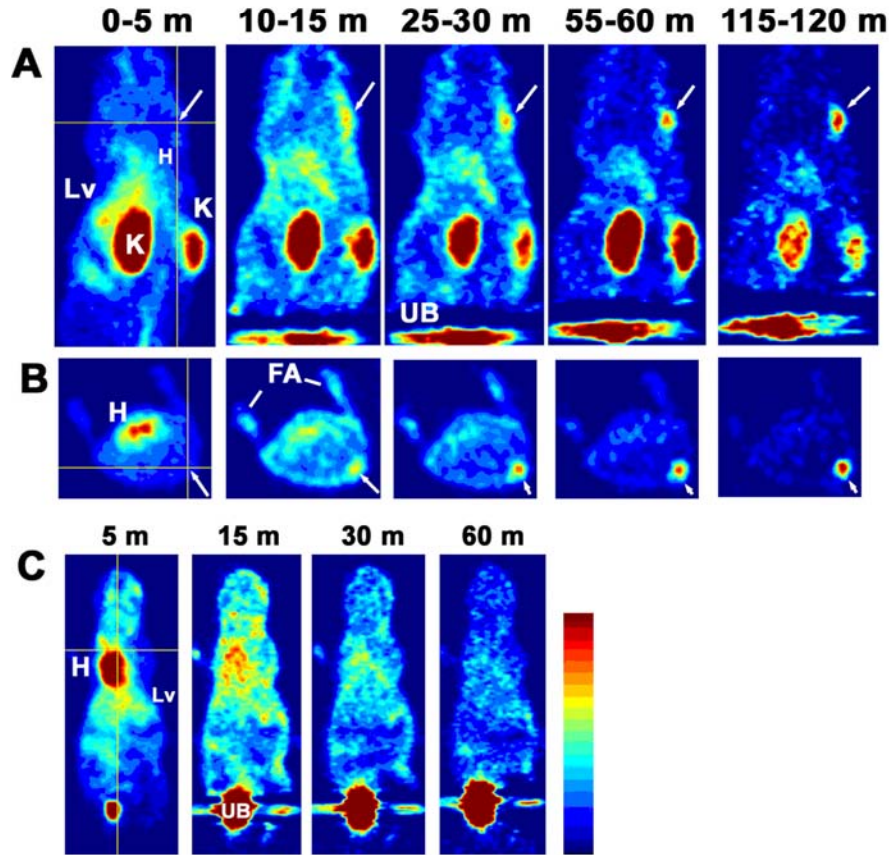

**Supplemental FIGURE 1.** Dynamic imaging study of pretargeted Al[F-18]-IMP 449 given to a nude mouse bearing a 35-mg LS174T human colonic cancer xenograft in the upper flank. The top 2 panels show coronal (A) and transverse (B) sections taken of a region of the body centering on the tumor's peripheral location at 5 different 5-min intervals over the 120-min imaging session. The first image on the left in each sectional view shows the positioning of the tumor at the intersection of the crosshairs, which is highlighted by arrows. The animal was partially tilted to its right side during the imaging session. The bottom panel (C) shows an additional coronal section of a more anterior plane to highlight distribution in the liver and intestines. The color bar shows the scale, with blue having the least activity and brown being the most intense activity. Abbreviations: FA, forearms; H, heart; K, kidney; Lv, liver; UB, urinary bladder.
